# Supplementary material for: The Efficacy of Cognitive-Behavioral Therapy and Psychodynamic Therapy in the Outpatient Treatment of Major Depression: A Randomized Clinical Trial
Source: Atypon-hosted journal article supplement (doi:10.1176/appi.ajp.2013.12070899), 2013-09-01
Supplement: 1041_ds001.pdf [file 1041_ds001.pdf]

## Supplemental material

**Table 1-Suppl: Additional treatments during the follow-up period by condition\***

| Variable                          | CBT  |      | Psychodynamic |      | Statistic (df)   | p-value |
|-----------------------------------|------|------|---------------|------|------------------|---------|
|                                   | n    | %    | n             | %    |                  |         |
| <b>Any treatment</b>              | 41   | 44.6 | 32            | 33.0 | $\chi^2(1)=2.67$ | .10     |
|                                   | n    | %    | n             | %    |                  |         |
| <b>Anti-depressant medication</b> | 9    | 9.8  | 9             | 9.3  | $\chi^2(1)=0.01$ | .91     |
|                                   | mean | SD   | mean          | SD   |                  |         |
| Number of consultations           | 4.7  | 4.3  | 3.6           | 1.7  | $t(16)=0.72$     | .48     |
|                                   | n    | %    | n             | %    |                  |         |
| <b>Out-patient psychotherapy</b>  | 32   | 34.8 | 24            | 25.0 | $\chi^2(1)=2.15$ | .14     |
|                                   | mean | SD   | mean          | SD   |                  |         |
| Number of sessions                | 5.8  | 3.0  | 6.5           | 10.2 | $t(54)=2.75$     | .73     |
|                                   | n    | %    | n             | %    |                  |         |
| Type of therapist                 |      |      |               |      | $\chi^2(2)=5.36$ | .07     |
| - Psychiatrist                    | 3    | 9.7  | 8             | 36.4 |                  |         |
| - Psychologist/psychotherapist    | 21   | 67.7 | 11            | 50.0 |                  |         |
| - Unknown                         | 7    | 22.6 | 3             | 13.6 |                  |         |
|                                   | n    | %    | n             | %    |                  |         |
| <b>Day treatment</b>              | 0    | 0.0  | 1             | 1.0  | $\chi^2(1)=0.95$ | .99     |
|                                   | mean | SD   | mean          | SD   |                  |         |
| Number of days                    | -    | -    | 4             | -    | -                | -       |
|                                   | n    | %    | n             | %    |                  |         |
| <b>Inpatient treatment</b>        | 2    | 2.2  | 0             | 0.0  | $\chi^2(1)=2.16$ | .23     |
|                                   | mean | SD   | mean          | SD   |                  |         |
| Number of days                    | 15.5 | 10.6 | -             | -    | -                | -       |

|                        | n    | %   | n    | %   |                  |     |
|------------------------|------|-----|------|-----|------------------|-----|
| <b>Other treatment</b> | 8    | 8.7 | 4    | 4.2 | $\chi^2(1)=1.61$ | .20 |
|                        | mean | SD  | mean | SD  |                  |     |
| Number of sessions     | 6.1  | 8.0 | 6.0  | 3.5 | $t(10)=0.03$     | .98 |

---



---

\*Pharmacotherapy continuation according to protocol in the severely depressed subsample was not considered here.

Note: CBT = cognitive behavioral therapy.

**Table 2-Suppl: Serious adverse events during treatment and follow-up by condition**

| Type of event                      | Treatment |               | Follow-up |               |
|------------------------------------|-----------|---------------|-----------|---------------|
|                                    | CBT       | Psychodynamic | CBT       | Psychodynamic |
|                                    | (n=164)   | (n=177)       | (n=164)   | (n=177)       |
| Alcohol abuse during consultation  | 0         | 1             | 0         | 0             |
| Addition treatment started for:    |           |               |           |               |
| - Increase of depressive symptoms  | 4         | 1             | 2         | 2             |
| - Suicidal ideation                | 2         | 4             | 1         | 1             |
| - Post-traumatic stress disorder   | 1         | 0             | 0         | 0             |
| - Pain symptoms                    | 0         | 2             | 0         | 0             |
| Psychosis                          | 1         | 0             | 0         | 1             |
| Severe antidepressant side effects | 1         | 1             | 0         | 0             |
| Major life event                   | 1         | 2             | 0         | 0             |
| Total (n)                          | 10        | 11            | 3         | 4             |
| Total (%)                          | 6.1       | 6.2           | 1.8       | 2.3           |

Note: CBT = cognitive behavioral therapy.
